# Supplementary material for: Enhancing Insights into Australia’s Gonococcal Surveillance Programme through Stochastic Modelling
Source: MDPI journal article supplement (doi:10.3390/pathogens12070907), 2023-07-04

Table S1 Australian Gonococcal Surveillance Program (AGSP) scenario tree Model parameter inputs with respective description, assumptions, and source of information.

| Component                     | Input               | Description                                                                                                                                                                                                             | Assumptions                                                                                                                                                                                                                                                                                                                                                                                                  | Source                                                  |
|-------------------------------|---------------------|-------------------------------------------------------------------------------------------------------------------------------------------------------------------------------------------------------------------------|--------------------------------------------------------------------------------------------------------------------------------------------------------------------------------------------------------------------------------------------------------------------------------------------------------------------------------------------------------------------------------------------------------------|---------------------------------------------------------|
| <b>N<sub>AMenHealth</sub></b> | 0.52                | An estimate parameter for which a male will present to a health service for the possibility the individual will receive a diagnosis and pathology test given they are asymptomatic for <i>N. gonorrhoeae</i> infection. | <ul style="list-style-type: none"> <li>No direct parameter can be sourced regarding asymptomatic presentation of individuals. Estimate based on annualised proportion of males who visit general practice once.</li> </ul>                                                                                                                                                                                   | <a href="#">[1]</a>                                     |
| <b>N<sub>SMenHealth</sub></b> | Uniform [0.80-0.99] | An estimate parameter for which a male will present to a health service for the possibility the individual will receive a diagnosis and pathology test given they are symptomatic for <i>N. gonorrhoeae</i> infection.  | <ul style="list-style-type: none"> <li>The parameter is an estimate based on clinician's perceived behaviour regarding probability of presentation.</li> <li>Uncertainty has been included to account for contextual factors such as accessibility and health literacy which may influence presentation.</li> <li>Uniform distribution assumes there is equal probability that this proportion of</li> </ul> | <a href="#">[2]</a> ,<br>Expert<br>Opinion <sup>1</sup> |

| Component     | Input               | Description                                                                                                                                                                                                               | Assumptions                                                                                                                                                                                                                                                                                                                                                                                                                                                                                                                 | Source                                 |
|---------------|---------------------|---------------------------------------------------------------------------------------------------------------------------------------------------------------------------------------------------------------------------|-----------------------------------------------------------------------------------------------------------------------------------------------------------------------------------------------------------------------------------------------------------------------------------------------------------------------------------------------------------------------------------------------------------------------------------------------------------------------------------------------------------------------------|----------------------------------------|
| NSWomenHealth | Uniform [0.80-0.99] | An estimate parameter for which a female will present to a health service for the possibility the individual will receive a diagnosis and pathology test given they are symptomatic for <i>N. gonorrhoeae</i> infection.  | <p>individuals captures the true population parameter.</p> <ul style="list-style-type: none"> <li>The parameter is an estimate based on clinician's perceived behaviour regarding probability of presentation.</li> <li>Uncertainty has been included to account for contextual factors such as accessibility and health literacy which may influence presentation.</li> <li>Uniform distribution assumes there is equal probability that this proportion of individuals captures the true population parameter.</li> </ul> | [2],<br>Expert<br>Opinion <sup>1</sup> |
|               |                     |                                                                                                                                                                                                                           | <ul style="list-style-type: none"> <li>Based on the proportion of females attending a general practice clinic over an annualised period.</li> </ul>                                                                                                                                                                                                                                                                                                                                                                         |                                        |
| NAWomenHealth | 0.65                | An estimate parameter for which a female will present to a health service for the possibility the individual will receive a diagnosis and pathology test given they are asymptomatic for <i>N. gonorrhoeae</i> infection. |                                                                                                                                                                                                                                                                                                                                                                                                                                                                                                                             | [1]                                    |

| Component              | Input                  | Description                                                                                                                                                                                                                                                                                                                                                                                                                                                                        | Assumptions                                                                                                                                                                                                                                                                                                                                                                                                                                                                                                                                                                                                                | Source                                                 |
|------------------------|------------------------|------------------------------------------------------------------------------------------------------------------------------------------------------------------------------------------------------------------------------------------------------------------------------------------------------------------------------------------------------------------------------------------------------------------------------------------------------------------------------------|----------------------------------------------------------------------------------------------------------------------------------------------------------------------------------------------------------------------------------------------------------------------------------------------------------------------------------------------------------------------------------------------------------------------------------------------------------------------------------------------------------------------------------------------------------------------------------------------------------------------------|--------------------------------------------------------|
| <b>N<sub>AST</sub></b> | Uniform<br>[0.2 – 0.3] | An estimate proportion for the number of <i>N. gonorrhoeae</i> isolates that contain associated antibiotic susceptibility data (AST) for the determination of resistance status. The estimate covers isolates that are tested at a laboratory within the National Neisseria Network laboratory for antimicrobial susceptibility. Estimates have been pulled the Australian Gonococcal Surveillance Program reports published within the Communicable Disease Intelligence journal. | <ul style="list-style-type: none"> <li>• This has been used as a general indicator for clinician initiating susceptibility testing based on evidence of total number of isolates with susceptibility data present.</li> <li>• All tests are results are reported and are subsequently presented in reports.</li> <li>• Does not account for private laboratories.</li> <li>• Same methodology is employed by reference laboratories with comparable results.</li> <li>• The estimate also considers the probability parallel culture has been initiated as evidenced by the proportion of samples with AST data</li> </ul> | Expert Opinion <sup>3</sup> ,<br><a href="#">[3-5]</a> |

| Component                  | Input                      | Description                                                                                                                                                                                                             | Assumptions                                                                                                                                                       | Source                        |
|----------------------------|----------------------------|-------------------------------------------------------------------------------------------------------------------------------------------------------------------------------------------------------------------------|-------------------------------------------------------------------------------------------------------------------------------------------------------------------|-------------------------------|
| $N_{\text{Asymptomatic}}$  | Uniform [0.05 – 0.15]      | The probability that an individual is infected with <i>N. Gonorrhoeae</i> and does not display symptoms. Split into sexes due to anatomical differences                                                                 | <ul style="list-style-type: none"> <li>Anatomical differences may influence the recognition of <i>N. gonorrhoeae</i> infection and result in different</li> </ul> |                               |
| $N_{\text{ComHealth}}$     | Uniform [0.1 – 0.175]      | The proportion of tests completed by a community healthcare service. This refers to healthcare services outside of tertiary and general practice primary care such as nurse-led clinics and Indigenous health services. | <ul style="list-style-type: none"> <li>Does not take into account resource allocations for community healthcare settings.</li> </ul>                              | Expert Opinion <sup>2</sup>   |
| $N_{\text{ComHealthSym}}$  | PERT [0.9 – 0.95 – 0.99]   | Probability for the initiation of diagnostic testing within a community health setting for both male and female given they are symptomatic                                                                              | <ul style="list-style-type: none"> <li>Uncertainty has been included to do with clinician behaviour, competency, and familiarity with disease</li> </ul>          | Expert Opinion <sup>2</sup>   |
| $N_{\text{ComHealthAsym}}$ | Uniform [0.01 – 0.05]      | Probability for the initiation of diagnostic testing within a community health setting for both male and female given they are asymptomatic                                                                             | <ul style="list-style-type: none"> <li>Includes follow up locations and maternity care as possible reasons for sexual health screening</li> </ul>                 | Expert Opinion <sup>1</sup>   |
| $N_{\text{ComTest}}$       | <b>Symptomatic</b><br>PERT | The probability that a test will be initiated by a clinician within a community healthcare setting.                                                                                                                     | <ul style="list-style-type: none"> <li>Assumed to have a similar probability with primary care GPs</li> <li>Assumes same for males and females</li> </ul>         | Expert Opinion <sup>1,2</sup> |

| Component                   | Input                                                                  | Description                                                                                                                                                                                                                | Assumptions                                                                                                                                                                                                                                                                                                                         | Source                              |
|-----------------------------|------------------------------------------------------------------------|----------------------------------------------------------------------------------------------------------------------------------------------------------------------------------------------------------------------------|-------------------------------------------------------------------------------------------------------------------------------------------------------------------------------------------------------------------------------------------------------------------------------------------------------------------------------------|-------------------------------------|
|                             | [0.9 – 0.95 – 0.99]<br><b>Asymptomatic</b><br>Uniform<br>[0.01 – 0.05] |                                                                                                                                                                                                                            | <ul style="list-style-type: none"> <li>Delay in presentation is still treated as presented (assuming no delay)</li> </ul>                                                                                                                                                                                                           |                                     |
| <b>N<sub>FAInitGP</sub></b> | PERT<br>[0.046 – 0.0465 – 0.047]                                       | An estimate probability for which an asymptomatic female attends a general practice clinic and has diagnostic testing initiated by the clinician. This is the precedent event for potential diagnostic and culture events. | <ul style="list-style-type: none"> <li>The parameter includes screening for other conditions and/or pregnancy. It assumes this is consistent for detection of <i>N. Gonorrhoeae</i></li> <li>The assumption is a general check-up is for asymptomatic presentations</li> <li>Calculated through an average of the points</li> </ul> | [6],<br>Expert Opinion <sup>2</sup> |
| <b>N<sub>SInitGP</sub></b>  | PERT<br>[0.925 – 0.9575 – 0.99]                                        | Probability for a general practitioner to initiate diagnostic testing for <i>N. gonorrhoeae</i> that is symptomatic                                                                                                        | <ul style="list-style-type: none"> <li>Includes uncertainty with regards to clinician familiarity, behaviour, health literacy of the patient.</li> </ul>                                                                                                                                                                            | Expert Opinion <sup>1,2</sup>       |

| Component                  | Input | Description                                                                                                                                                                                                                                             | Assumptions                                                                                                                                                                                                                                                                                                                                                              | Source                      |
|----------------------------|-------|---------------------------------------------------------------------------------------------------------------------------------------------------------------------------------------------------------------------------------------------------------|--------------------------------------------------------------------------------------------------------------------------------------------------------------------------------------------------------------------------------------------------------------------------------------------------------------------------------------------------------------------------|-----------------------------|
|                            |       |                                                                                                                                                                                                                                                         | <ul style="list-style-type: none"> <li>Anatomical differences also introduce some uncertainty.</li> <li>Assumed to be the same for males and females</li> </ul>                                                                                                                                                                                                          |                             |
| $N_{\text{female}}$        |       | N. <i>Gonorrhoeae</i> displays different symptoms based on the anatomical differences. This affects the diagnostic pathways for which an individual presents to get tested.                                                                             |                                                                                                                                                                                                                                                                                                                                                                          |                             |
| $N_{\text{InitSexHealth}}$ | 0.99  | The probability a sexual health screening test to detect N. <i>gonorrhoeae</i> through a sexual health screening initiated within a sexual health clinic. This includes males and females attending sexual health clinics regardless of symptom status. | <ul style="list-style-type: none"> <li>The parameter includes follow up and initial consultation at a sexual health clinic.</li> <li>Sexual health clinics are assumed for individuals to already want to have sexual health testing completed and will be mandatory.</li> <li>The probability for males and females is the same regardless of symptom status</li> </ul> | Expert Opinion <sup>1</sup> |

| Component      | Input                        | Description                                                                                                                                                                                                                                                                                                                                                                                                                         | Assumptions                                                                                                                                                                                                                                                                                                                     | Source |
|----------------|------------------------------|-------------------------------------------------------------------------------------------------------------------------------------------------------------------------------------------------------------------------------------------------------------------------------------------------------------------------------------------------------------------------------------------------------------------------------------|---------------------------------------------------------------------------------------------------------------------------------------------------------------------------------------------------------------------------------------------------------------------------------------------------------------------------------|--------|
| $N_{FSInitGP}$ | PERT<br>[0.70 – 0.75 – 0.80] | The probability that a diagnosis is initiated completed within the primary health context with a general practitioner when an individual is symptomatic. The parameter is inclusive of public and private healthcare. Uncertainty has been included to factor in determinants such as competency and familiarity with disease have been included within the parameter. The parameter is inclusive of symptomatic males and females. | <ul style="list-style-type: none"> <li>It is assumed with an individual is symptomatic there is a high likelihood for the clinician to initiate diagnostic testing.</li> <li>Uncertainty for correct tests due to familiarity with condition has been factored into the parameter</li> </ul>                                    |        |
| $N_{MAInitGP}$ | PERT[0.04 – 0.0475 – 0.055]  | The probability an asymptomatic male undergoes a general check-up as indicated by pathology requests to initiate diagnosis.                                                                                                                                                                                                                                                                                                         | <ul style="list-style-type: none"> <li>The parameter includes screening for other conditions. It assumes this is consistent for detection of <i>N. Gonorrhoeae</i></li> <li>The assumption is a general check-up is for asymptomatic presentations</li> <li>Calculated through an average of the minimum and maximum</li> </ul> | [6]    |

| Component                | Input                | Description                                                                                                                                                                 | Assumptions                                                                                                                                                                                                                                            | Source              |
|--------------------------|----------------------|-----------------------------------------------------------------------------------------------------------------------------------------------------------------------------|--------------------------------------------------------------------------------------------------------------------------------------------------------------------------------------------------------------------------------------------------------|---------------------|
| $N_{\text{male}}$        |                      | <i>N. Gonorrhoeae</i> displays different symptoms based on the anatomical differences. This affects the diagnostic pathways for which an individual presents to get tested. |                                                                                                                                                                                                                                                        |                     |
| $N_{\text{MenAsymptom}}$ | Uniform[0.05 – 0.10] | The proportion of men that are asymptomatic with <i>N. Gonorrhoeae</i>                                                                                                      | <ul style="list-style-type: none"> <li>The complement of <math>N_{\text{MenSymptom}}</math></li> </ul>                                                                                                                                                 | <a href="#">[7]</a> |
| $N_{\text{MenSymptom}}$  | Uniform[0.85 – 0.90] | The proportion of men that are symptomatic with <i>N. Gonorrhoeae</i>                                                                                                       | <ul style="list-style-type: none"> <li>Symptomatic with urogenital, anorectal, or pharyngeal symptoms</li> </ul>                                                                                                                                       | <a href="#">[7]</a> |
| $NSe_{\text{Cult}}$      | Uniform[0.85 – 0.99] | The sensitivity of the culture to determine antibiotic susceptibility for the <i>N. Gonorrhoeae</i> isolate.                                                                | <ul style="list-style-type: none"> <li>The parameter for assumes a usable sample will be presented for culture.</li> <li>Assumes the initiation of parallel culture or culture during follow up event with <i>N. gonorrhoeae</i> infection.</li> </ul> | <a href="#">[8]</a> |
| $NSe_{\text{Test}}$      | Uniform[0.85 – 1]    | The sensitivity of the diagnostic performed to diagnose <i>N. Gonorrhoeae</i> .                                                                                             | <ul style="list-style-type: none"> <li>Testing sensitivity is dependent test type. The parameter is a pooled estimate of Microscopy, and NAAT.</li> </ul>                                                                                              | <a href="#">[8]</a> |



| Component              | Input                        | Description                                                                                                                                                                                                                                                   | Assumptions                                                                                                                                                                                                                                                                                | Source                              |
|------------------------|------------------------------|---------------------------------------------------------------------------------------------------------------------------------------------------------------------------------------------------------------------------------------------------------------|--------------------------------------------------------------------------------------------------------------------------------------------------------------------------------------------------------------------------------------------------------------------------------------------|-------------------------------------|
| $N_{\text{SexHealth}}$ | Uniform<br>[0.1 – 0.175]     | The proportion of tests completed at a sexual health clinic. The clinics are dedicated to sexually transmittable disease testing.                                                                                                                             | <ul style="list-style-type: none"> <li>Remains constant and does not change across strata.</li> </ul>                                                                                                                                                                                      | Expert<br>Opinion <sup>2</sup>      |
| $N_{\text{GP}}$        | PERT<br>[0.70 – 0.75 – 0.80] | The proportion of tests completed by general practitioners                                                                                                                                                                                                    | <ul style="list-style-type: none"> <li>There is an assumption that primary healthcare services write the most pathology requests.</li> <li>There are negligible differences between the intensity of testing between geographical locations as it is difficult to parameterise.</li> </ul> | [6], Expert<br>Opinion <sup>1</sup> |
| $N_{\text{SinitGP}}$   | PERT<br>[0.90 – 0.95 – 0.99] | The probability that a diagnosis is initiated completed within the primary health context with a general practitioner when an individual is symptomatic. The parameter is inclusive of public and private healthcare. Uncertainty of clinician competency has | <ul style="list-style-type: none"> <li>It is assumed with an individual is symptomatic there is a high likelihood for the clinician to initiate diagnostic testing</li> </ul>                                                                                                              | Expert<br>Opinion <sup>1</sup>      |

| Component                        | Input                 | Description                                                                                                                                                | Assumptions                                                                                                                                                                                                                                                                   | Source                        |
|----------------------------------|-----------------------|------------------------------------------------------------------------------------------------------------------------------------------------------------|-------------------------------------------------------------------------------------------------------------------------------------------------------------------------------------------------------------------------------------------------------------------------------|-------------------------------|
|                                  |                       | been included within the parameter. The parameter is inclusive of males and females.                                                                       | <ul style="list-style-type: none"> <li>Uncertainty for correct tests due to familiarity with condition has been factored into the parameter</li> </ul>                                                                                                                        |                               |
| <b>N<sub>Tertiary</sub></b>      | Uniform[0.01 – 0.05]  | The proportion of sexual tests completed within a tertiary healthcare setting. Excluding those within a collected within an outpatient setting.            | <ul style="list-style-type: none"> <li>Assumed to be the same for asymptomatic and symptomatic presentations</li> <li>For women pregnant women testing is assumed to be much greater at antenatal visits and thus probability for testing sequentially is affected</li> </ul> | Expert Opinion <sup>1,2</sup> |
|                                  | <b>Male</b>           |                                                                                                                                                            |                                                                                                                                                                                                                                                                               |                               |
| <b>N<sub>AlnitTertiary</sub></b> | Uniform [0.01 – 0.05] | An estimate probability of having diagnostic testing initiated for those asymptomatic within a tertiary healthcare setting. Tertiary care includes routine | <ul style="list-style-type: none"> <li>Antenatal care stipulates routine sexual health testing is a core component.</li> </ul>                                                                                                                                                | Expert                        |
|                                  | <b>Female</b>         | hospital inpatient as well as emergency department.                                                                                                        | <ul style="list-style-type: none"> <li>Sexual health testing in tertiary care for males is uncommon</li> </ul>                                                                                                                                                                | Opinion <sup>1</sup>          |
|                                  | Uniform [0.02 – 0.06] |                                                                                                                                                            |                                                                                                                                                                                                                                                                               |                               |

| Component                  | Input                        | Description                                                                                                              | Assumptions                                                                                                                                                                                                                                                     | Source                        |
|----------------------------|------------------------------|--------------------------------------------------------------------------------------------------------------------------|-----------------------------------------------------------------------------------------------------------------------------------------------------------------------------------------------------------------------------------------------------------------|-------------------------------|
| $N_{\text{SinitTertiary}}$ | PERT<br>[0.90 – 0.95 – 0.99] | Estimate probability of the initiation of diagnostic testing for those symptomatic within a tertiary healthcare setting. | <ul style="list-style-type: none"> <li>Tertiary healthcare setting will indicate no resource constraints and will allow for immediate testing with full capacity.</li> <li>Does not consider different varying resource constraints of the hospital.</li> </ul> | Expert Opinion <sup>1,2</sup> |
| $N_{\text{WomenAsymptom}}$ | 0.8                          | The proportion of women who are asymptomatic with <i>N. Gonorrhoeae</i>                                                  | <ul style="list-style-type: none"> <li>Complement of <math>N_{\text{WomenSymptom}}</math></li> </ul>                                                                                                                                                            | [7]                           |
| $N_{\text{WomenSymptom}}$  | 0.2                          | The proportion of women that are symptomatic with <i>N. Gonorrhoeae</i>                                                  | <ul style="list-style-type: none"> <li>Symptomatic with urogenital, anorectal, or pharyngeal symptoms</li> </ul>                                                                                                                                                | [7]                           |

<sup>1</sup> Sexual health nurse academic in public health

<sup>2</sup> Infectious disease physician

<sup>3</sup> Clinical microbiologist involved in the Australian Gonococcal Surveillance Program (AGSP)

## References

1. ABS: **Patient Experiences in Australia: Summary of Findings**. Australian Bureau of Statistics  
[\[https://www.abs.gov.au/statistics/health/health-services/patient-experiences-australia-summary-findings/latest-release#data-download\]](https://www.abs.gov.au/statistics/health/health-services/patient-experiences-australia-summary-findings/latest-release#data-download)
2. Patel CG, Tao G: **STI/HIV Testing and Prevalence of Gonorrhea and Chlamydia Among Persons with Their Specified-Type Sex Partner**. *Am J Med* 2022, **135**(2):196-201.
3. Lahra MM, Hogan TR, Shoushtari M, Armstrong BH: **Australian Gonococcal Surveillance Programme Annual Report, 2020**. *Commun Dis Intell (2018)* 2021, **45**.
4. Lahra MM, Hogan TR: **Australian Gonococcal Surveillance Programme Annual Report, 2021**. *Communicable Diseases Intelligence* 2022, **46**.
5. Trembizki E, Jennison AV, Buckley C, Bright A, Holds J, Ward A, Pitt J, Pendle S, Baird R, Freeman K, Robson J, Mhango L, Lowry K, Lahra M, Whiley D: **Enhanced molecular surveillance in response to the detection of extensively resistant gonorrhoea in Australia**. *J Antimicrob Chemother* 2021, **76**(1):270-271.
6. C. Bayram, L. Venti: **GP pathology ordering**. *General practice in Australia: health priorities and policies 1998 to 2008 General practice series no 24 Cat no GEP 24* 2009.
7. ASHM: **Gonorrhoea** [\[https://sti.guidelines.org.au/sexually-transmissible-infections/gonorrhoea/\]](https://sti.guidelines.org.au/sexually-transmissible-infections/gonorrhoea/)
8. PHLN: **Gonococcal infection (Neisseria gonorrhoeae): Laboratory case definition**. Public Health Laboratory Network; 2002  
[\[https://www.health.gov.au/sites/default/files/documents/2022/06/gonococcal-infection-laboratory-case-definition\\_0.pdf\]](https://www.health.gov.au/sites/default/files/documents/2022/06/gonococcal-infection-laboratory-case-definition_0.pdf)

Table 2 Gonococcal component sensitivities

| sex   | symptom  | location  | mean          | ower95        | upper95       |
|-------|----------|-----------|---------------|---------------|---------------|
| men   | asymptom | community | 0.00013227084 | 0.00013183855 | 0.00013270313 |
| men   | asymptom | gp        | 0.00114149192 | 0.00113934414 | 0.00114363969 |
| men   | asymptom | sexhealth | 0.00435833223 | 0.00434918102 | 0.00436748344 |
| men   | asymptom | tertiary  | 0.00002882314 | 0.00002870564 | 0.00002894064 |
| men   | symptom  | community | 0.06506986705 | 0.06499436214 | 0.06514537196 |
| men   | symptom  | gp        | 0.35824206798 | 0.35801651846 | 0.35846761751 |
| men   | symptom  | sexhealth | 0.06785288932 | 0.06777487052 | 0.06793090811 |
| men   | symptom  | tertiary  | 0.01419671074 | 0.01416161979 | 0.01423180170 |
| women | asymptom | community | 0.00068616446 | 0.00068472689 | 0.00068760202 |
| women | asymptom | gp        | 0.00434404361 | 0.00434213616 | 0.00434595107 |
| women | asymptom | sexhealth | 0.01694247876 | 0.01692454907 | 0.01696040845 |
| women | asymptom | tertiary  | 0.00014954539 | 0.00014908257 | 0.00015000821 |
| women | symptom  | community | 0.00562475060 | 0.00561832117 | 0.00563118002 |
| women | symptom  | gp        | 0.03096334928 | 0.03094486804 | 0.03098183052 |
| women | symptom  | sexhealth | 0.00586493291 | 0.00585828420 | 0.00587158163 |
| women | symptom  | tertiary  | 0.00122705249 | 0.00122403173 | 0.00123007325 |

Table 3 Antibiotic resistance component sensitivities

| sex   | symptom  | location  | mean           | lower95        | upper95       |
|-------|----------|-----------|----------------|----------------|---------------|
| men   | asymptom | community | 0.000033069132 | 0.000032957919 | 0.00003318035 |
| men   | asymptom | gp        | 0.000285379918 | 0.000284802544 | 0.00028595729 |
| men   | asymptom | sexhealth | 0.001089702140 | 0.001087270458 | 0.00109213382 |
| men   | asymptom | tertiary  | 0.000007205352 | 0.000007175363 | 0.00000723534 |
| men   | symptom  | community | 0.016272204663 | 0.016249845770 | 0.01629456356 |
| men   | symptom  | gp        | 0.089576155660 | 0.089490280164 | 0.08966203116 |
| men   | symptom  | sexhealth | 0.016967594075 | 0.016944430819 | 0.01699075733 |
| men   | symptom  | tertiary  | 0.003549775995 | 0.003540581836 | 0.00355897015 |
| women | asymptom | community | 0.000171558696 | 0.000171176927 | 0.00017194046 |
| women | asymptom | gp        | 0.001086139213 | 0.001085224980 | 0.00108705345 |
| women | asymptom | sexhealth | 0.004236483691 | 0.004231034949 | 0.00424193243 |
| women | asymptom | tertiary  | 0.000037390074 | 0.000037270568 | 0.00003750958 |
| women | symptom  | community | 0.001406531618 | 0.001404621325 | 0.00140844191 |
| women | symptom  | gp        | 0.007741778963 | 0.007734539716 | 0.00774901821 |
| women | symptom  | sexhealth | 0.001466535552 | 0.001464556251 | 0.00146851485 |
| women | symptom  | tertiary  | 0.000306792255 | 0.000306001226 | 0.00030758328 |

Figure 1 Full scenario tree model with parameters of the Australian gonococcal surveillance system program (AGSP)

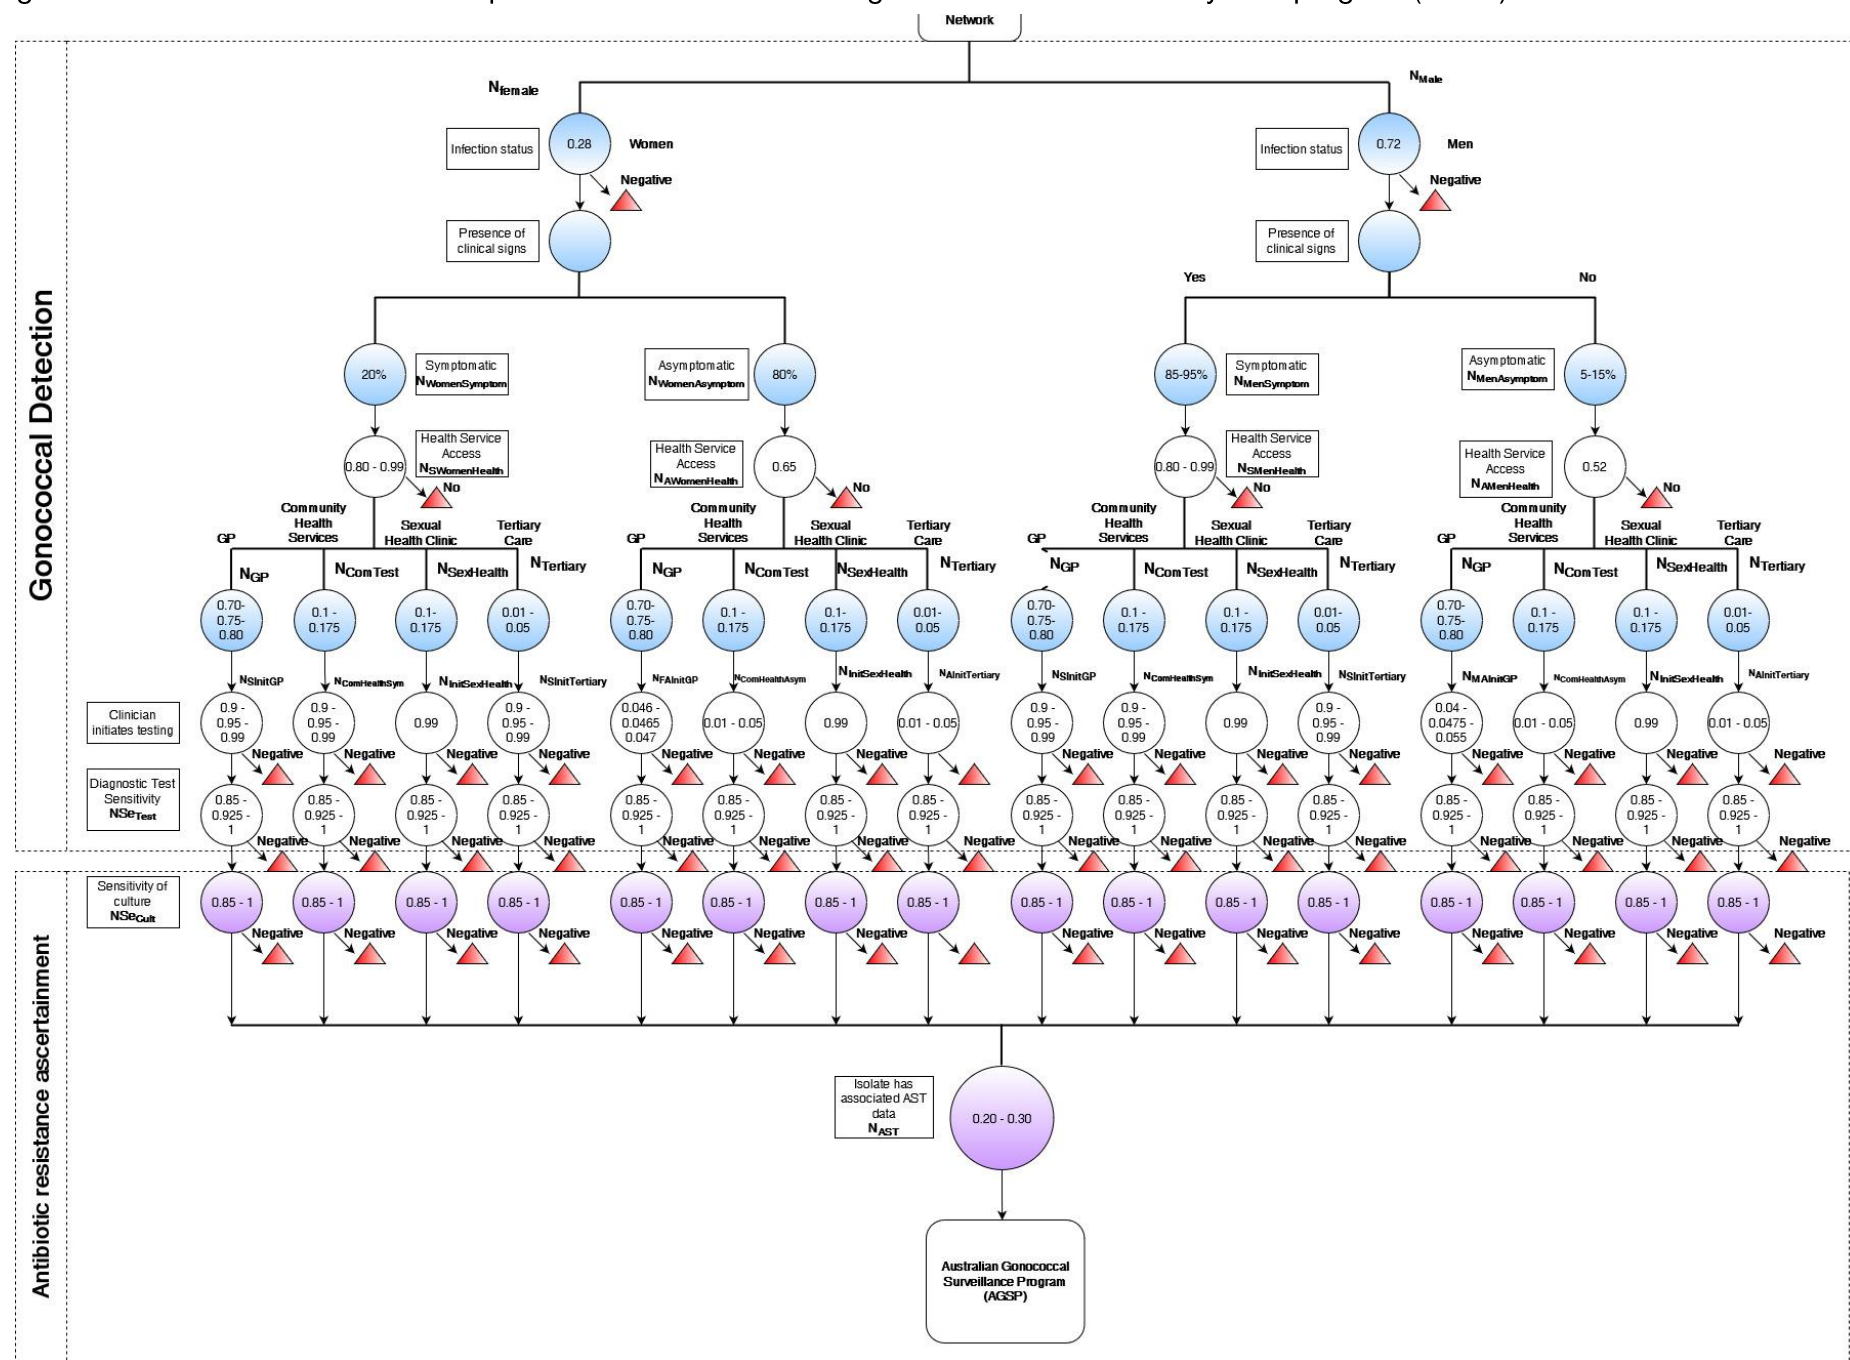

Supplement: s1 [file s1]
