# Supplementary material for: Enhancing Insights into Australia’s Gonococcal Surveillance Programme through Stochastic Modelling
Source: MDPI journal article supplement (doi:10.3390/pathogens12070907), 2023-07-04
Supplement: s1 [file s1]

## **Supplementary File S2 – Model Implementation**

R Code with Supplementary Files are available at:

<https://github.com/Phu-Do/ScenarioTreeModelling>
